# Supplementary material
Source: PubMed Central journal article supplement (PMC2805446)
Supplement: NIHMS163337-supplement-01.pdf [file NIHMS163337-supplement-01.pdf]

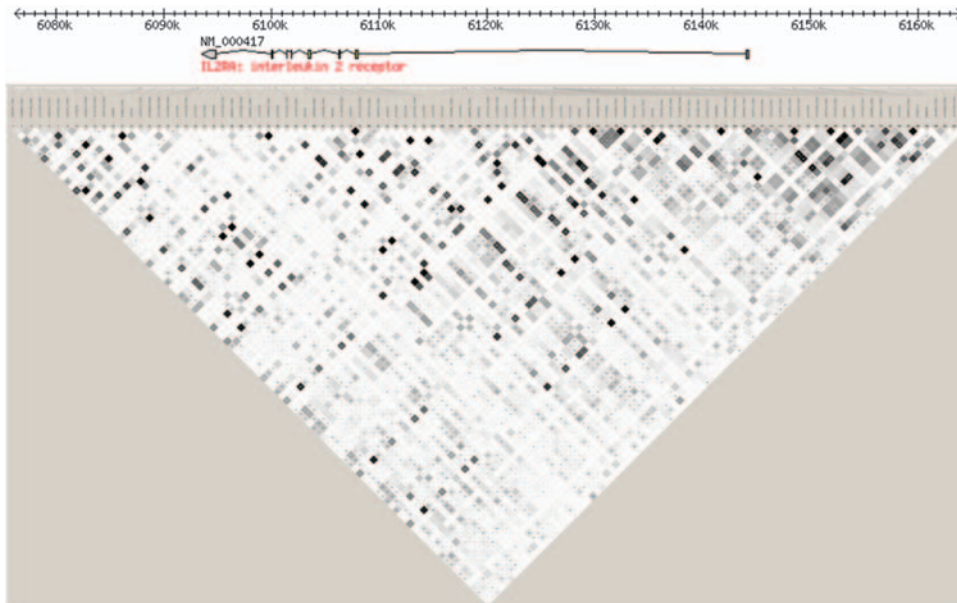

**Supplementary Figure 1** The LD map of the *IL2RA* SNPs based on the HapMap CEU data (Public Release #21a in Jan 2007, [www.hapmap.org](http://www.hapmap.org)). 69 SNPs were genotyped by the T1DGC (the SNP IDs with “\_T1DGC”). The T1DGC SNPs captured 93.7% HapMap SNPs with  $MAF \geq 0.05$  at  $r^2 > 0.8$  in this region, and 45% HapMap SNPs with  $0.001 \leq MAF < 0.05$ . The haplotype map is made by the Haploview v4.0 software ([www.broad.mit.edu/personal/jcbarret/haploview](http://www.broad.mit.edu/personal/jcbarret/haploview)).  $D'$  values (%) are shown in the boxes, and the empty boxes have  $D'=1$ . The grey scale represents the  $r^2$  values.

**Supplementary Table 1** The T1D association assay of 69 *IL2RAS* SNPs

| Marker     | Physical Position | ILMN call rate | ILMN HWE p | SQNM call rate | SQNM HWE p | Consistency of ILMN vs. SQNM | MA | MAF   | ILMN T1D association Z | ILMN T1D association P  | SQNM T1D association Z | SQNM T1D association P  |
|------------|-------------------|----------------|------------|----------------|------------|------------------------------|----|-------|------------------------|-------------------------|------------------------|-------------------------|
| rs6602363  | 6,076,150         | 0.998          | 0.927      | 0.984          | 0.005      | 0.987                        | A  | 0.319 | 0.563                  | 0.574                   | 0.164                  | 0.870                   |
| rs7898880  | 6,077,559         | 0.999          | 0.297      | 0.993          | 0.160      | 0.998                        | T  | 0.225 | -0.002                 | 0.998                   | -0.276                 | 0.782                   |
| rs7911500  | 6,077,732         | 0.999          | 0.573      | 0.995          | 0.181      | 0.999                        | A  | 0.127 | 2.168                  | 0.030                   | 1.737                  | 0.082                   |
| rs17147986 | 6,078,484         | --             | --         | 0.983          | 0.331      | --                           | A  | 0.167 | --                     | --                      | -0.915                 | 0.360                   |
| rs6602364  | 6,078,859         | 1.000          | 0.502      | 0.997          | 0.254      | 0.998                        | G  | 0.440 | -1.243                 | 0.214                   | -0.831                 | 0.406                   |
| rs1323653  | 6,079,064         | 0.984          | 0.460      | 0.989          | 0.481      | 1.000                        | G  | 0.095 | -0.583                 | 0.560                   | -0.250                 | 0.802                   |
| rs7477011  | 6,080,600         | 0.999          | 0.236      | 0.983          | 0.069      | 0.978                        | A  | 0.495 | 0.719                  | 0.472                   | 0.454                  | 0.650                   |
| rs10795731 | 6,082,040         | 0.999          | 0.382      | 0.996          | 1.000      | 1.000                        | C  | 0.050 | -0.800                 | 0.424                   | -0.798                 | 0.425                   |
| rs17322780 | 6,082,478         | 0.999          | 1.000      | 0.988          | 0.973      | 1.000                        | G  | 0.104 | 0.226                  | 0.821                   | -0.113                 | 0.910                   |
| rs10795733 | 6,083,484         | 0.995          | 0.412      | 0.980          | 0.110      | 0.983                        | C  | 0.498 | -0.768                 | 0.443                   | 0.292                  | 0.770                   |
| rs764851   | 6,087,950         | 1.000          | 0.552      | 0.986          | 0.303      | 0.999                        | A  | 0.161 | -0.400                 | 0.689                   | -1.294                 | 0.196                   |
| rs10795737 | 6,089,350         | 0.987          | 0.091      | 0.997          | 0.704      | 1.000                        | A  | 0.262 | 0.913                  | 0.361                   | 0.656                  | 0.512                   |
| rs12359875 | 6,091,113         | 0.999          | 0.287      | 0.989          | 0.362      | 1.000                        | T  | 0.230 | -0.022                 | 0.983                   | -0.186                 | 0.853                   |
| rs12722608 | 6,092,847         | 1.000          | 0.591      | 0.995          | 0.338      | 1.000                        | T  | 0.039 | 0.481                  | 0.630                   | -0.087                 | 0.931                   |
| rs12722605 | 6,093,169         | 0.999          | 0.582      | 0.976          | 0.722      | 1.000                        | A  | 0.161 | 1.598                  | 0.110                   | 0.318                  | 0.751                   |
| rs12244380 | 6,093,380         | 0.998          | 1.000      | 0.997          | 0.904      | 1.000                        | C  | 0.428 | -1.825                 | 0.068                   | -1.469                 | 0.142                   |
| rs12722598 | 6,095,156         | 0.996          | 1.000      | 0.995          | 0.000      | 0.998                        | G  | 0.013 | 0.152                  | 0.880                   | 0.076                  | 0.940                   |
| rs9663421  | 6,095,610         | 0.998          | 0.171      | 0.993          | 0.338      | 1.000                        | A  | 0.268 | 0.032                  | 0.974                   | -0.474                 | 0.635                   |
| rs12722596 | 6,096,300         | 1.000          | 0.871      | 0.987          | 0.916      | 1.000                        | G  | 0.098 | -0.469                 | 0.639                   | 0.299                  | 0.765                   |
| rs2386841  | 6,097,738         | 0.999          | 0.866      | 0.971          | 0.306      | 0.979                        | T  | 0.167 | 1.867                  | 0.062                   | 0.794                  | 0.427                   |
| rs7899538  | 6,099,904         | 0.999          | 0.304      | 0.955          | 0.001      | 0.998                        | A  | 0.129 | 2.275                  | 0.023                   | 0.383                  | 0.701                   |
| rs12722588 | 6,100,439         | 1.000          | 0.831      | 0.995          | 0.849      | 1.000                        | A  | 0.193 | 0.234                  | 0.815                   | -0.331                 | 0.741                   |
| rs2274037  | 6,102,114         | 0.999          | 1.000      | 0.993          | 1.000      | 1.000                        | A  | 0.040 | 0.412                  | 0.681                   | -0.117                 | 0.907                   |
| rs2076846  | 6,103,259         | 0.999          | 0.300      | 0.989          | 0.011      | 0.990                        | G  | 0.340 | -0.852                 | 0.394                   | -0.962                 | 0.336                   |
| rs7093069  | 6,103,325         | 1.000          | 0.831      | 0.989          | 0.464      | 0.999                        | A  | 0.193 | 0.188                  | 0.851                   | -0.351                 | 0.726                   |
| rs11596355 | 6,104,187         | 0.999          | 0.793      | 0.991          | 0.990      | 1.000                        | C  | 0.099 | 0.161                  | 0.872                   | 0.526                  | 0.599                   |
| rs12722574 | 6,106,468         | 0.999          | 0.467      | 0.990          | 0.504      | 0.999                        | T  | 0.229 | 1.227                  | 0.220                   | 0.499                  | 0.618                   |
| rs2031229  | 6,106,574         | 0.978          | 0.094      | --             | --         | --                           | A  | 0.238 | 1.306                  | 0.192                   | --                     | --                      |
| rs2025345  | 6,107,694         | 0.999          | 0.532      | 0.995          | 0.660      | 0.999                        | C  | 0.359 | 0.024                  | 0.980                   | -0.290                 | 0.772                   |
| rs12722561 | 6,109,899         | 0.999          | 0.286      | 0.985          | 0.548      | 0.986                        | A  | 0.158 | -0.537                 | 0.591                   | -2.248                 | 0.025                   |
| rs7910961  | 6,117,802         | 0.998          | 0.877      | 0.996          | 0.571      | 1.000                        | A  | 0.330 | 0.687                  | 0.492                   | 0.362                  | 0.718                   |
| rs6602391  | 6,118,038         | 0.999          | 0.211      | 0.995          | 0.095      | 1.000                        | T  | 0.072 | 0.111                  | 0.912                   | 0.463                  | 0.643                   |
| rs12722521 | 6,118,802         | 0.999          | 0.721      | --             | --         | --                           | T  | 0.044 | 1.230                  | 0.219                   | --                     | --                      |
| rs11256448 | 6,119,485         | --             | --         | 0.987          | 1.000      | --                           | G  | 0.272 | --                     | --                      | 1.588                  | 0.112                   |
| rs7072398  | 6,119,852         | 0.999          | 0.209      | 0.982          | 0.490      | 1.000                        | A  | 0.482 | 2.387                  | 0.017                   | 1.314                  | 0.189                   |
| rs12722518 | 6,120,643         | 0.999          | 1.000      | 0.985          | 0.958      | 0.995                        | G  | 0.044 | 1.201                  | 0.230                   | 0.207                  | 0.836                   |
| rs11256456 | 6,120,718         | 0.989          | 0.492      | 0.992          | 0.993      | 0.995                        | G  | 0.227 | 1.129                  | 0.259                   | 1.077                  | 0.281                   |
| rs12722516 | 6,121,223         | 1.000          | 0.199      | 0.986          | 0.000      | 0.993                        | C  | 0.031 | 0.028                  | 0.978                   | -2.304                 | 0.021                   |
| rs4749924  | 6,122,402         | 0.998          | 0.189      | 0.978          | 0.825      | 0.966                        | G  | 0.304 | 0.534                  | 0.593                   | -0.495                 | 0.620                   |
| rs6602398  | 6,122,959         | 0.997          | 0.187      | 0.994          | 0.149      | 0.999                        | A  | 0.303 | 0.480                  | 0.631                   | 0.263                  | 0.793                   |
| rs4749926  | 6,125,318         | 0.968          | 0.072      | 0.995          | 0.571      | 0.994                        | T  | 0.372 | -0.353                 | 0.724                   | 0.262                  | 0.793                   |
| rs10905656 | 6,126,099         | 0.999          | 0.967      | 0.979          | 0.147      | 0.991                        | A  | 0.410 | 1.180                  | 0.238                   | 1.479                  | 0.139                   |
| rs942201   | 6,126,298         | 0.987          | 0.417      | 0.994          | 0.647      | 1.000                        | T  | 0.239 | 0.857                  | 0.392                   | 1.301                  | 0.193                   |
| rs706780   | 6,127,032         | 0.992          | 0.491      | 0.996          | 0.529      | 0.999                        | T  | 0.052 | 1.086                  | 0.278                   | 1.743                  | 0.081                   |
| rs1107345  | 6,127,301         | 0.998          | 0.885      | 0.994          | 0.673      | 0.999                        | T  | 0.238 | 1.087                  | 0.277                   | 1.096                  | 0.273                   |
| rs11256497 | 6,127,800         | 0.992          | 0.160      | 0.995          | 0.345      | 0.999                        | A  | 0.380 | 2.390                  | 0.017                   | 1.661                  | 0.097                   |
| rs791587   | 6,128,705         | 0.998          | 0.971      | 0.988          | 0.878      | 1.000                        | A  | 0.486 | 1.852                  | 0.064                   | 1.397                  | 0.162                   |
| rs791589   | 6,129,577         | 0.943          | 0.797      | --             | --         | --                           | G  | 0.142 | -1.707                 | 0.088                   | --                     | --                      |
| rs791590   | 6,130,328         | 1.000          | 0.434      | 0.983          | 0.350      | 0.999                        | T  | 0.159 | -1.056                 | 0.291                   | -1.873                 | 0.061                   |
| rs10905669 | 6,132,099         | 1.000          | 0.238      | 0.959          | 0.011      | 0.948                        | T  | 0.246 | 0.989                  | 0.322                   | -1.669                 | 0.095                   |
| *          |                   |                |            |                |            |                              |    |       |                        |                         |                        |                         |
| rs1323658  | 6,134,360         | 0.998          | 0.588      | 0.989          | 0.541      | 1.000                        | G  | 0.056 | -0.512                 | 0.609                   | -0.324                 | 0.746                   |
| rs2476491  | 6,135,416         | 0.999          | 0.816      | 0.989          | 0.862      | 0.999                        | A  | 0.299 | 1.400                  | 0.161                   | 0.527                  | 0.598                   |
| rs2256774  | 6,137,171         | 0.999          | 0.504      | 0.964          | 0.000      | 0.963                        | C  | 0.359 | 1.162                  | 0.245                   | 0.083                  | 0.934                   |
| rs706779   | 6,138,830         | 0.998          | 0.882      | 0.985          | 0.377      | 0.988                        | C  | 0.448 | -1.680                 | 0.093                   | -2.166                 | 0.030                   |
| rs706778   | 6,138,955         | 0.999          | 0.073      | 0.967          | 0.431      | 0.991                        | T  | 0.439 | 1.996                  | 0.046                   | 1.987                  | 0.047                   |
| rs2104286  | 6,139,051         | 0.998          | 0.852      | --             | --         | --                           | C  | 0.231 | -3.407                 | 6.56 x 10 <sup>-3</sup> | --                     | --                      |
| rs3134883  | 6,140,731         | 0.998          | 1.000      | 0.997          | 0.884      | 1.000                        | A  | 0.322 | 2.458                  | 0.014                   | 2.549                  | 0.011                   |
| rs3118470  | 6,141,719         | 0.998          | 0.601      | 0.994          | 0.846      | 0.999                        | C  | 0.342 | 2.846                  | 4.43 x 10 <sup>-3</sup> | 3.156                  | 1.60 x 10 <sup>-3</sup> |
| rs12722486 | 6,143,768         | 1.000          | 0.384      | 0.984          | 0.000      | 0.731                        | T  | 0.053 | -0.978                 | 0.328                   | -0.532                 | 0.595                   |
| *          |                   |                |            |                |            |                              |    |       |                        |                         |                        |                         |
| rs7072793  | 6,146,272         | 1.000          | 0.081      | 0.996          | 0.213      | 1.000                        | C  | 0.443 | 2.019                  | 0.043                   | 2.246                  | 0.025                   |
| rs7073236  | 6,146,558         | 0.963          | 0.374      | 0.991          | 0.289      | 0.999                        | C  | 0.444 | 1.489                  | 0.136                   | 2.287                  | 0.022                   |
| rs4147359  | 6,148,445         | --             | --         | 0.995          | 0.143      | --                           | A  | 0.372 | --                     | --                      | 2.093                  | 0.036                   |
| rs7089861  | 6,150,332         | 0.999          | 0.318      | 0.989          | 0.330      | 1.000                        | G  | 0.276 | -0.995                 | 0.320                   | -1.302                 | 0.193                   |
| rs7090512  | 6,150,835         | 0.999          | 0.201      | 0.992          | 0.308      | 1.000                        | G  | 0.311 | 0.425                  | 0.671                   | -0.202                 | 0.840                   |
| rs1887027  | 6,153,788         | 0.995          | 0.405      | 0.997          | 0.462      | 1.000                        | T  | 0.210 | -1.250                 | 0.211                   | -1.424                 | 0.154                   |
| rs4749955  | 6,158,972         | 0.997          | 0.373      | 0.994          | 0.281      | 0.999                        | C  | 0.426 | -3.262                 | 1.10 x 10 <sup>-3</sup> | -2.699                 | 6.96 x 10 <sup>-3</sup> |
| rs11594656 | 6,162,015         | 0.999          | 0.364      | 0.986          | 0.260      | 0.964                        | A  | 0.252 | 0.482                  | 0.629                   | -0.623                 | 0.534                   |
| rs12251307 | 6,163,501         | 0.999          | 0.858      | 0.998          | 0.824      | 1.000                        | A  | 0.099 | -3.148                 | 1.64 x 10 <sup>-3</sup> | -2.211                 | 0.027                   |
| rs7100400  | 6,164,086         | 0.999          | 0.502      | 0.993          | 0.908      | 1.000                        | C  | 0.047 | 0.433                  | 0.665                   | 1.345                  | 0.179                   |

T1D association was tested by the Family Based Association Test (FBAT) (<http://www.biostat.harvard.edu/~fbat/fbat.htm>).<sup>14</sup> Considering that most of the T1DGC families have multiple siblings, the option of the empirical variance was used in the FBAT statistics to permit a robust but unbiased test of genetic association. \* Low Consistency rate of the genotyping methods and, therefore, not used for analysis.

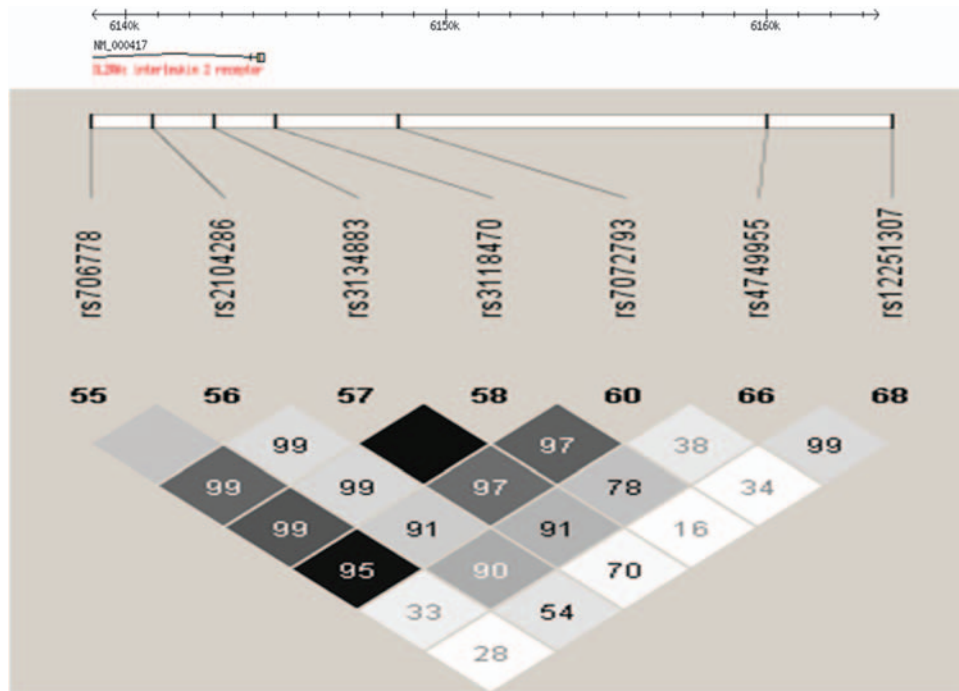

**Supplementary Figure 2** The LD map of the T1D-associated *IL2RA* SNPs based on the Illumina genotyping data from the T1DGC. The haplotype map is made by the Haploview v4.0 software ([www.broad.mit.edu/personal/jcbarret/haploview](http://www.broad.mit.edu/personal/jcbarret/haploview)).  $D'$  values (%) are shown in the boxes, and the empty boxes have  $D'=1$ . The grey scale represents the  $r^2$  values.
